# Supplementary material
Source: PubMed Central journal article supplement (PMC6990869)

## Supplementary Online Content

Shields CL, Dalvin LA, Chang M, et al. Visual outcome at 4 years following plaque radiotherapy and prophylactic intravitreal bevacizumab (every 4 months for 2 years) for uveal melanoma: comparison with nonrandomized historical control individuals. *JAMA Ophthalmol*. Published online December 12, 2019. doi:10.1001/jamaophthalmol.2019.5132

**eTable 1.** Plaque Radiotherapy and Prophylactic Bevacizumab (Every 4 Months for 2 Years) for Uveal Melanoma in 1131 Eyes of 1131 Patients: Demographic Features

**eTable 2.** Plaque Radiotherapy and Prophylactic Bevacizumab (Every 4 Months for 2 Years) for Uveal Melanoma in 1131 Patients: Plaque Radiotherapy Features

**eFigure 1.** Kaplan-Meier Analysis for Radiation Side Effects After Plaque Radiotherapy and Prophylactic Intravitreal Bevacizumab for Uveal Melanoma

**eFigure 2.** Number of Patients with Available Follow-up Over the Course of Four Years After Plaque Radiotherapy and Prophylactic Intravitreal Bevacizumab for Uveal Melanoma

This supplementary material has been provided by the authors to give readers additional information about their work.

**eTable 1. Plaque radiotherapy and prophylactic bevacizumab (every 4 months for 2 years) for uveal melanoma in 1131 eyes of 1131 patients: Demographic features.**

| <b>Demographic Features</b>             | <b>Bevacizumab Group (n=1131) [n (%)]</b> | <b>Control Group (n=117) [n (%)]</b> | <b>p-values</b> |
|-----------------------------------------|-------------------------------------------|--------------------------------------|-----------------|
| <b>Age (years)</b>                      |                                           |                                      |                 |
| Mean (median, range)                    | 60 (61, 20-97)                            | 59 (60, 19-87)                       | .55             |
| <b>Race</b>                             |                                           |                                      |                 |
| Caucasian                               | 1081 (96)                                 | 114 (97)                             | .74             |
| African American                        | 3 (<1)                                    | 0 (0)                                |                 |
| Hispanic                                | 20 (2)                                    | 3 (3)                                |                 |
| Asian                                   | 1 (<1)                                    | 0 (0)                                |                 |
| Middle Eastern                          | 3 (<1)                                    | 0 (0)                                |                 |
| Other/unknown                           | 23 (2)                                    | 0 (0)                                |                 |
| <b>Sex</b>                              |                                           |                                      |                 |
| Male                                    | 557 (49)                                  | 59 (50)                              | .81             |
| Female                                  | 574 (51)                                  | 58 (50)                              |                 |
| <b>Involved eye</b>                     |                                           |                                      |                 |
| Right                                   | 565 (50)                                  | 60 (51)                              | .79             |
| Left                                    | 566 (50)                                  | 57 (49)                              |                 |
| <b>Medical History</b>                  |                                           |                                      |                 |
| Dysplastic nevus syndrome               | 4 (<1)                                    | 0 (0)                                | .13             |
| Skin melanoma                           | 36 (3)                                    | 3 (3)                                | .92             |
| Diabetes                                | 156 (14)                                  | 15 (13)                              | .77             |
| Hypertension                            | 478 (42)                                  | 48 (41)                              | .80             |
| <b>Ocular history</b>                   |                                           |                                      |                 |
| Uveal melanoma (fellow eye)             | 1 (<1)                                    | 0 (0)                                | .16             |
| Conjunctival melanoma                   | 0 (0)                                     | 0 (0)                                | NA              |
| Conjunctival primary acquired melanosis | 2 (<1)                                    | 0 (0)                                | .45             |
| Ocular melanocytosis                    | 35 (3)                                    | 5 (4)                                | .50             |

**eTable 2. Plaque radiotherapy and prophylactic bevacizumab (every 4 months for 2 years) for uveal melanoma in 1131 patients: Plaque radiotherapy features.**

| Plaque Radiotherapy Features     | Bevacizumab Group (n=1131) [n (%)] | Control Group (n=117) [n (%)] | p-values    |
|----------------------------------|------------------------------------|-------------------------------|-------------|
| Total treatment duration (hours) |                                    |                               |             |
| Mean, (median, range)            | 101 (96, 21-173)                   | 102 (97, 93-172)              | .28         |
| Plaque shape                     |                                    |                               |             |
| Round                            | 849 (75)                           | 91 (78)                       | <b>.04</b>  |
| Notched                          | 225 (20)                           | 26 (22)                       |             |
| Deep notched                     | 57 (5)                             | 0 (0)                         |             |
| Distance from plaque (mm)        |                                    |                               |             |
| Mean, (median, range)            |                                    |                               |             |
| Tumor apex                       | 6 (5, 3-14)                        | 6 (5, 3-14)                   | .41         |
| Tumor base                       | 1 (1, 1-1)                         | 1 (1, 1-1)                    | NA          |
| Optic disc                       | 12 (12, 5-23)                      | 13 (13, 6-22)                 | .11         |
| Foveola                          | 11 (11, 1-23)                      | 12 (11, 2-21)                 | .38         |
| Lens                             | 17 (17, 5-20)                      | 16 (17, 9-20)                 | .26         |
| Sclera                           | 0 (0, 0-0)                         | 0 (0, 0-0)                    | NA          |
| Radiation Dose (Gy)              |                                    |                               |             |
| Mean, (median, range)            |                                    |                               |             |
| Tumor apex                       | 70 (70, 35-83)                     | 68 (70, 68-70)*               | .09         |
| Tumor base                       | 184 (155, 46-605)                  | 186 (149, 78-552)*            | .93         |
| Optic disc                       | 38 (29, 4-217)                     | 37 (31, 5-182)                | .92         |
| Foveola                          | 57 (38, 4-508)                     | 57 (40, 7-265)                | .93         |
| Lens                             | 19 (11, 2-185)                     | 22 (13, 3-103)                | .14         |
| Sclera                           | 184 (155, 46-605)                  | 212 (168, 89-631)             | <b>.002</b> |
| Opposite retina                  | 7 (5, 1-74)                        | 7 (6, 2-21)                   | .43         |
| Radiation Dose Rate (Gy/hour)    |                                    |                               |             |
| Mean, (median, range)            |                                    |                               |             |
| Tumor apex                       | 72 (74, 38-99)                     | 72 (74, 37-133)               | .87         |
| Tumor base                       | 185 (164, 50-485)                  | 189 (167, 62-434)             | .55         |
| Optic disc                       | 38 (31, 4-230)                     | 38 (31, 6-197)                | .81         |
| Foveola                          | 58 (39, 2-374)                     | 61 (40, 7-289)                | .55         |
| Lens                             | 19 (12, 2-133)                     | 22 (13, 1-103)                | .06         |
| Sclera                           | 185 (164, 50-485)                  | 209 (183, 96-434)             | <b>.001</b> |
| Opposite retina                  | 7 (5, 2-73)                        | 7 (6, 2-17)                   | .08         |

\*The definition of Gy changed in 2007, after which time our practice adjusted numerical radiation dosages to achieve equivalent radiation delivery to tumor apex and other structures. Patients in the control group were largely treated prior to this adjustment. When this is accounted for, mean radiation dose (median, range) to tumor apex and base in the control group is listed in the table. However, prior to this re-calculation the apex dose was recorded as 78 (80, 68-80), base dose as 212 (170, 89-631), apex dose rate as 80 (84, 43-152), and base dose rate as 207 (179, 71-434). Outcomes were adjusted in subsequent tables using multivariate analysis to account for the potential confounder of difference in radiation dosage. Bold type p values indicate significance.

**eFigure 1. Kaplan-Meier Analysis for Radiation Side Effects After Plaque Radiotherapy and Prophylactic Intravitreal Bevacizumab for Uveal Melanoma.**

(A) Comparison of patients treated with prophylactic intravitreal bevacizumab at 4-month intervals for a duration of two years versus controls managed with observation alone revealed the bevacizumab group was associated with reduced cumulative probability of OCT-evident CME at 4 months (2% vs. 6%, hazard ratio [HR]=3.49,  $p=0.002$ ), 24 months (28% vs. 37%, HR=1.52,  $p=0.02$ ) and 36 months (44% vs. 54%, HR=1.53,  $p=0.01$ ).

(B) The bevacizumab group was associated with reduced cumulative probability of clinically-evident radiation maculopathy at 24 months (27% vs. 36%, HR=1.5,  $p=0.03$ ), 36 months (44% vs. 55%, HR=1.48,  $p=0.01$ ) and 48 months (61% vs. 66%, HR=1.39,  $p=0.03$ ).

(C) The bevacizumab group was associated with reduced cumulative probability of radiation papillopathy at 4 months (0% vs. 3%, HR= 5.92,  $p=0.02$ ) and 18 months (6% vs. 12%, HR=2.02,  $p=0.04$ ).

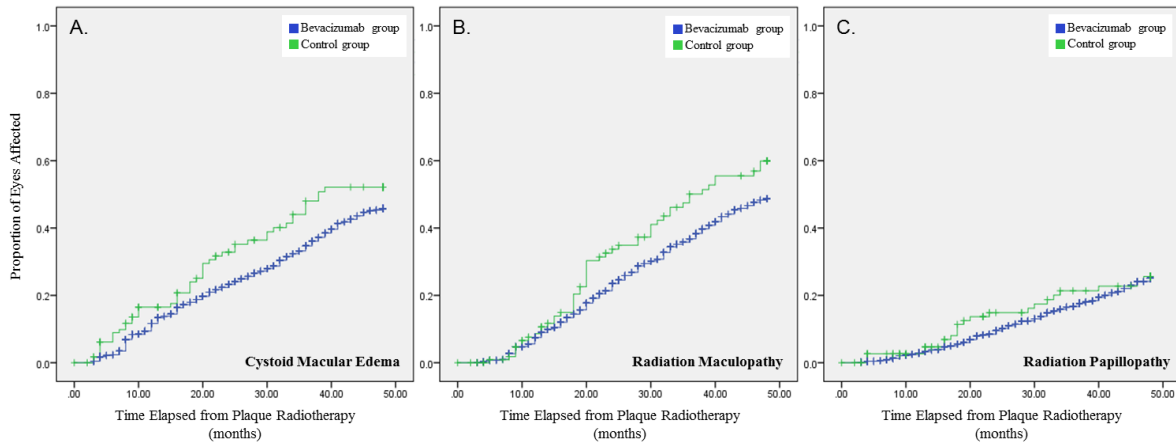

| Time interval | Bevacizumab Group (n=1131)<br>n <sup>a</sup> | Control Group (n=117)<br>n <sup>a</sup> |
|---------------|----------------------------------------------|-----------------------------------------|
| 4 Months      | 33/1080                                      | 9/109                                   |
| 8 Months      | 61/978                                       | 7/94                                    |
| 12 Months     | 48/851                                       | 1/81                                    |
| 18 Months     | 42/674                                       | 11/72                                   |
| 24 Months     | 35/561                                       | 3/57                                    |
| 36 Months     | 45/369                                       | 6/42                                    |
| 48 Months     | 2/122                                        | 0/17                                    |

| Time interval | Bevacizumab Group (n=1131)<br>n <sup>a</sup> | Control Group (n=117)<br>n <sup>a</sup> |
|---------------|----------------------------------------------|-----------------------------------------|
| 4 Months      | 11/1090                                      | 1/111                                   |
| 8 Months      | 47/1012                                      | 7/103                                   |
| 12 Months     | 47/896                                       | 6/89                                    |
| 18 Months     | 67/721                                       | 16/76                                   |
| 24 Months     | 61/590                                       | 4/56                                    |
| 36 Months     | 44/374                                       | 6/40                                    |
| 48 Months     | 2/122                                        | 0/14                                    |

| Time interval | Bevacizumab Group (n=1131)<br>n <sup>a</sup> | Control Group (n=117)<br>n <sup>a</sup> |
|---------------|----------------------------------------------|-----------------------------------------|
| 4 Months      | 8/1083                                       | 3/111                                   |
| 8 Months      | 16/1005                                      | 0/100                                   |
| 12 Months     | 14/917                                       | 2/92                                    |
| 18 Months     | 29/776                                       | 6/79                                    |
| 24 Months     | 29/659                                       | 1/68                                    |
| 36 Months     | 18/436                                       | 1/58                                    |
| 48 Months     | 4/158                                        | 0/26                                    |

<sup>a</sup>Number of events/number at risk

**eFigure 2. Number of Patients with Available Follow-up Over the Course of Four Years After Plaque Radiotherapy and Prophylactic Intravitreal Bevacizumab for Uveal Melanoma.**

Comparison of patients treated with prophylactic intravitreal bevacizumab at 4-month intervals for a duration of two years versus controls managed with observation alone revealed 1131 versus 117 patients entering the study and 390 versus 66 patients with follow-up at four years.

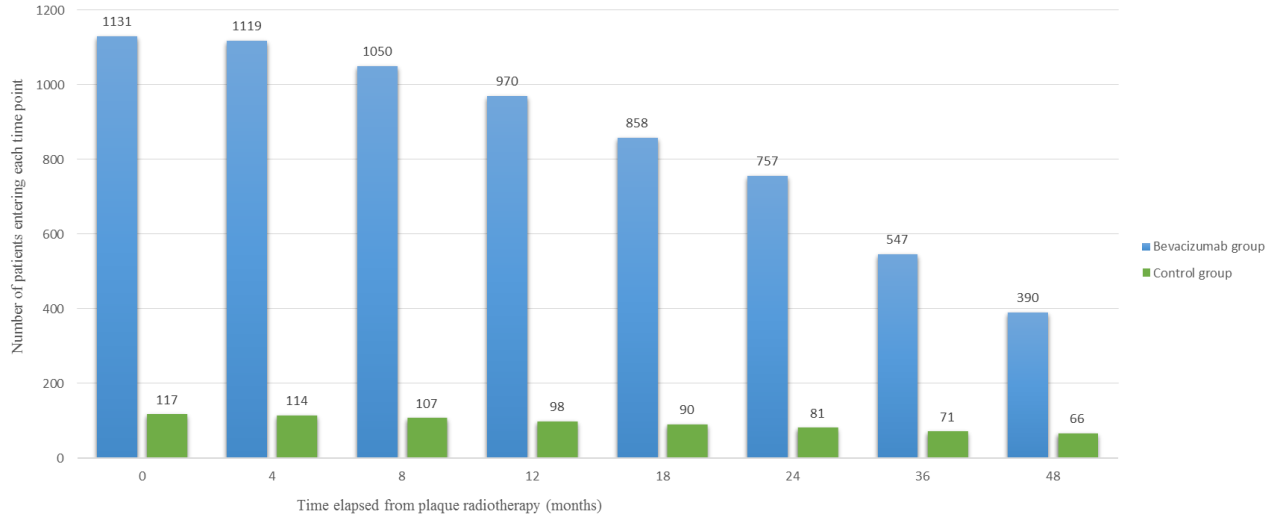

Supplement: jamaophthalmol-138-136-s001.pdf [file jamaophthalmol-138-136-s001.pdf]
